# Supplementary material for: Extending Protein Domain Boundary Predictors to Detect Discontinuous Domains
Source: PubMed Central journal article supplement (PMC4621036; doi:10.1371/journal.pone.0141541), 2015-10-26
Supplement: pone.0141541.s001.pdf [file pone.0141541.s001.pdf]

## Supporting Information

**S1 Table.** Domain definition of the 17 targets in CASP8, CASP9 and CASP10 to test DomEx

| Targets | Sequence Length | Domain Number | Domain Definition                                     |
|---------|-----------------|---------------|-------------------------------------------------------|
| T0416   | 332             | 2             | (6-119 194-315)(124-183)                              |
| T0431   | 491             | 2             | (7-79 344-372)(80-343 373-488)                        |
| T0445   | 264             | 2             | (1-81 191-264)(83-189)                                |
| T0472   | 110             | 2             | (1-51 102-110)(52-101)                                |
| T0504   | 208             | 3             | (1-62)(63-154)(157-208)                               |
| T0505   | 290             | 2             | (6-84 201-280)(86-199)                                |
| T0510   | 288             | 3             | (1-165)(166-235)(236-279)                             |
| T0521   | 179             | 2             | (1-34 107-179)(35-104)                                |
| T0533   | 313             | 2             | (7-89 181-296)(90-180)                                |
| T0543   | 887             | 4             | (56-95)(96-140)(141-540)(541-884)                     |
| T0589   | 465             | 3             | (24-188 271-369)(189-270)(370-464)                    |
| T0604   | 549             | 3             | (11-94)(95-291 497-548)(292-496)                      |
| T0628   | 295             | 2             | (6-132 279-295)(133-278)                              |
| T0629   | 216             | 2             | (1-49 209-216)(50-208)                                |
| T0651   | 254             | 3             | (1-95)(111-221)(222-254)                              |
| T0719   | 726             | 6             | (39-133)(134-249)(257-356)(357-448)(449-563)(564-726) |
| T0739   | 770             | 4             | (12-96)(97-154)(198-580)(581-769)                     |

From CASP8 to CASP10, there are total 17 multi-domain targets with more than 3 segments, the minimum domain length >30, and only 2 segments in one domain.
